# Supplementary material for: Memory effect in weakly-interacting Fe3O4 nanoparticles
Source: Royal Society of Chemistry journal article supplement (doi:10.1039/c5ra14332b), 2015-01-01

## Supporting information

### Memory Effect in Weakly-interacting Fe<sub>3</sub>O<sub>4</sub> Nanoparticles

Ashish Chhaganal Gandhi<sup>a,b</sup>, P. Muralidhar Reddy<sup>c,d</sup>, Ting-Shan Chan<sup>e</sup>, Yen-Peng  
Ho<sup>d</sup> and Sheng Yun Wu<sup>\*a</sup>

<sup>a</sup>Department of Physics, National Dong Hwa University, Hualien 97401, Taiwan

<sup>b</sup>Center for Condensed Matter Sciences, National Taiwan University, Taipei, Taiwan

<sup>c</sup>Department of Chemistry, Nizam College, Osmania University, Hyderabad, India

<sup>d</sup>Department of Chemistry, National Dong Hwa University, Hualien 97401, Taiwan

<sup>e</sup>National Synchrotron Radiation Research Center, Hsinchu 30076, Taiwan

Figure S1 Hysteresis loop of  $\text{Fe}_3\text{O}_4$  nanoparticles taken at 2 K under zero field cooling process. A small SEB field  $H_{SEB} = -5$  Oe was obtained from the  $M(H_a)$  loop.

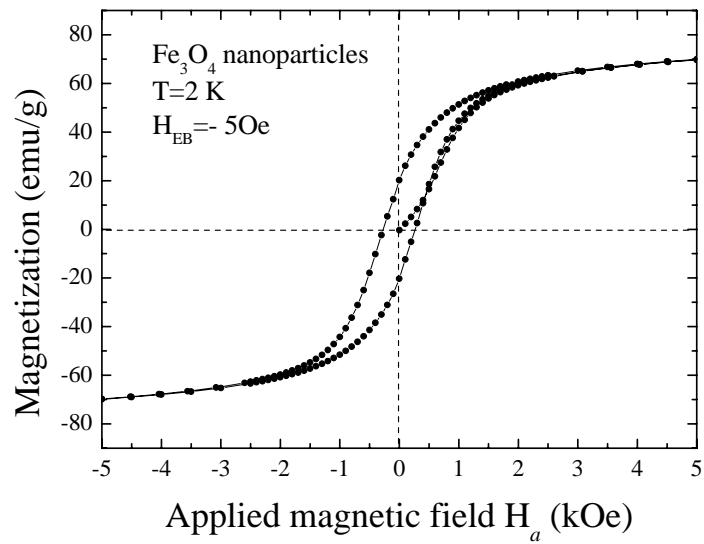

Supplement: c5ra14332b1.pdf [file c5ra14332b1.pdf]
